# Supplementary material for: An α-Bi2O3/BiOBr core–shell heterojunction with high photocatalytic activity
Source: Royal Society of Chemistry journal article supplement (doi:10.1039/c6dt04411e), 2017-01-01
Supplement: c6dt04411e1.pdf [file c6dt04411e1.pdf]

## An $\alpha$ -Bi<sub>2</sub>O<sub>3</sub>/BiOBr core-shell heterojunction with high photocatalytic activity

Lianwei Shan\*, Yuteng Liu, Hongtao Chen, Ze Wu, Zhidong Han

College of Material Science and Engineering, Harbin University of Science and Technology, Harbin 150040, China

\*Shlw0531@163.com (Corresponding author)

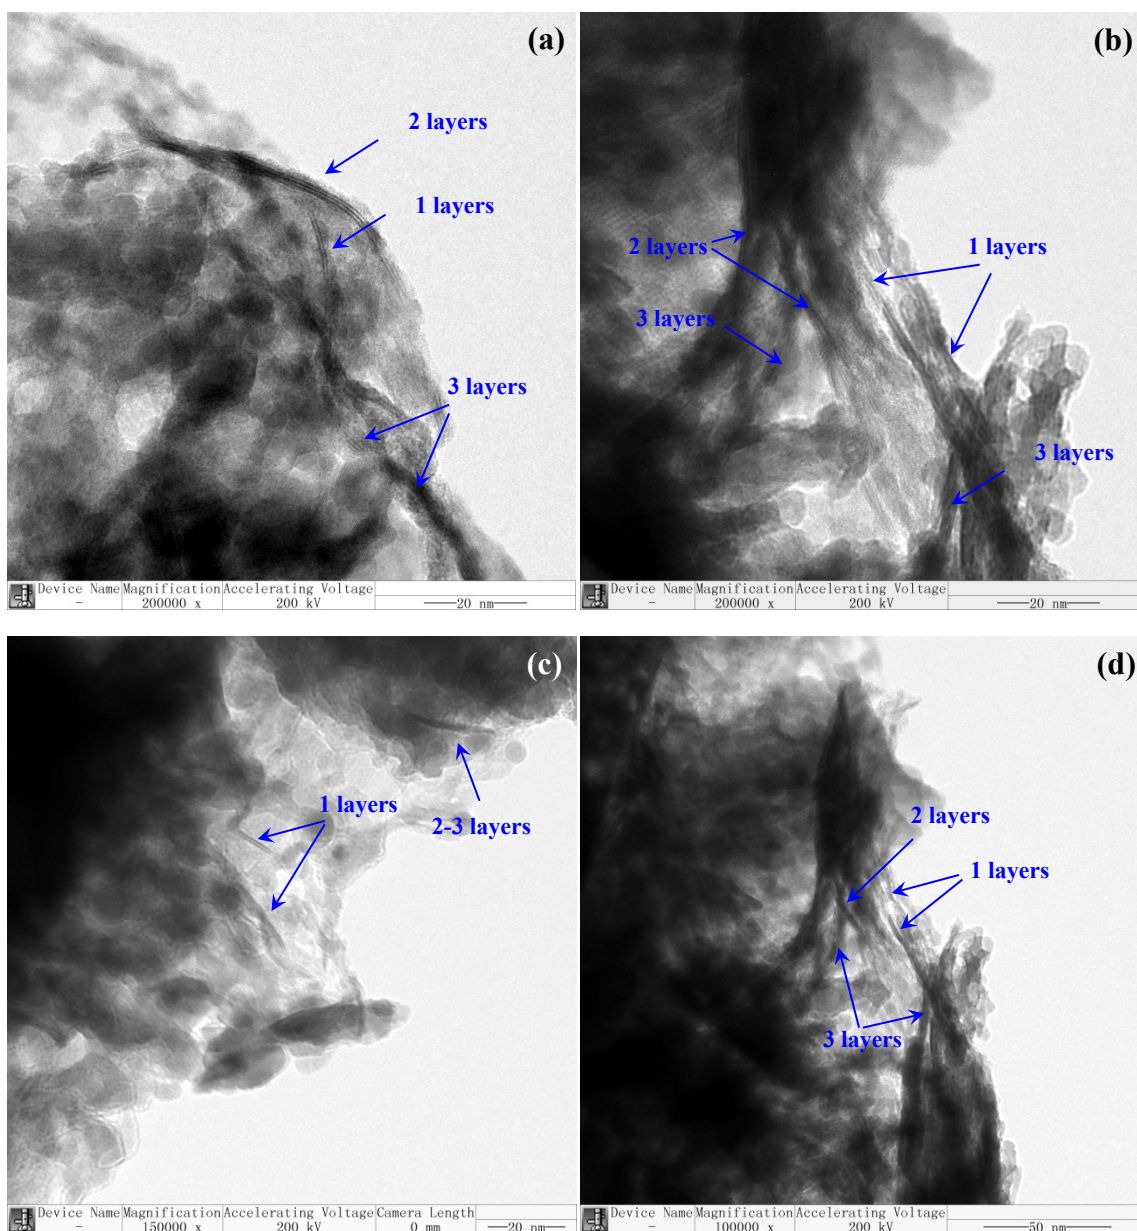

**Fig. S1** TEM image of  $\alpha$ -Bi<sub>2</sub>O<sub>3</sub>/BiOBr (CM1). In this figure, (a), (b), (c) and (d) is typical morphology for different particle, respectively.

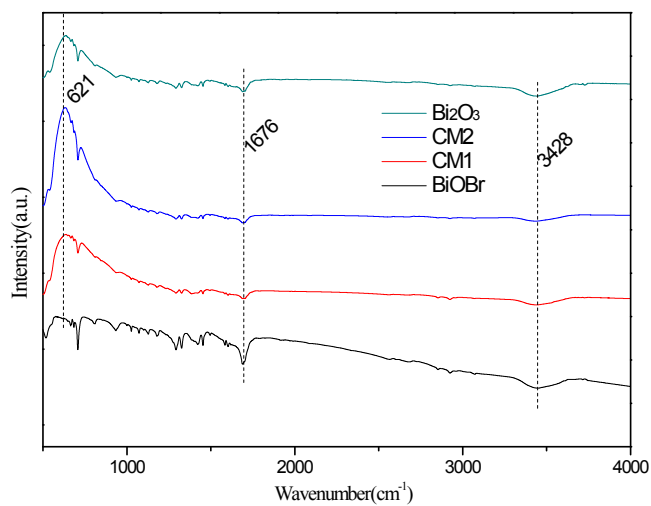

**Fig. S2** FTIR spectra of prepared samples

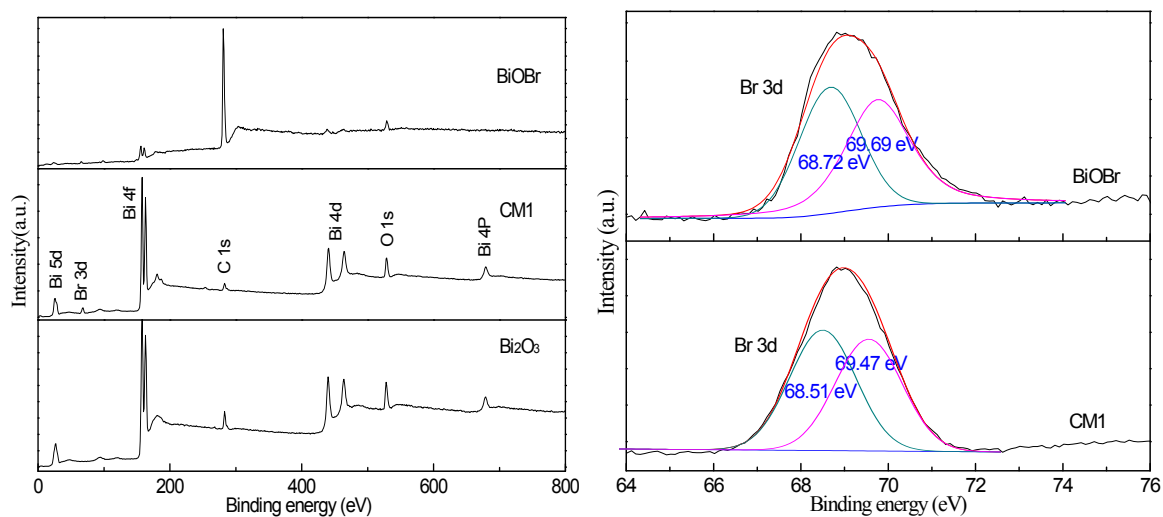

**Fig. S3** The XPS spectra for the BiOBr,  $\alpha$ -Bi<sub>2</sub>O<sub>3</sub>/BiOBr(CM1) and  $\alpha$ -Bi<sub>2</sub>O<sub>3</sub> samples.

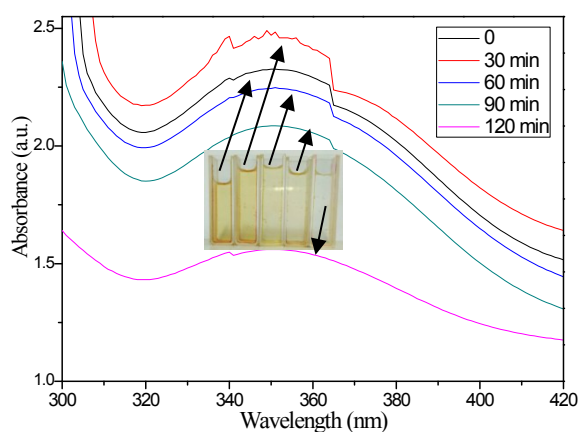

**Fig. S4** The UV-vis spectra taken over time during the photo-reduction of  $I_3^-$  mediated by CM1. The initial concentration of  $KI_3$  was  $1.76 \text{ g L}^{-1}$ . The photocatalyst dose was  $1.0 \text{ g L}^{-1}$ .
